# Supplementary material for: An Inventory of VHA Emergency Departments’ Resources and Processes for Caring for Women
Source: Springer Nature journal article supplement (doi:10.1007/s11606-012-2327-7), 2013-06-26
Supplement: MOESM1 [file 9020772]

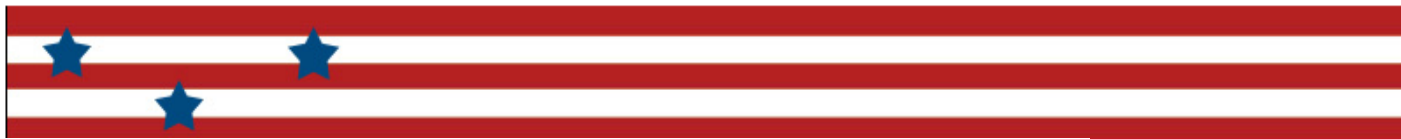

## **2011 VA Emergency Services for Women (ESW) Survey**

Thank you for filling in this survey on your ED's readiness to care for women Veterans. The results will be used to provide data to improve the care for women Veterans throughout VHA. A final report will be disseminated to you once results are analyzed and reviewed.

### **Completing the Survey:**

- 1) Complete the paper version of this survey, which follows this cover page. Note that the questions contained in the black-bordered grey shaded text boxes do not apply to every ED, so fill in these questions only if applicable. Answers to all other questions are required.
- 2) Review your responses with your Chief of Staff.
- 3) After obtaining approval by your Chief of Staff to enter your responses, enter them online at: <http://tinyurl.com/VA-ESW>. You will need to complete the online session in one setting.

1

### **Survey Follow-up:**

A member of the study team may contact you with specific questions about your responses to the survey.

### **Due Date:**

The survey must be submitted online by **June 13th, 2011.**

### **Where to call with questions:**

For technical help with filling in the online form call Alissa Simon at 323-841-0602 or send an email to [alissa.simon@va.gov](mailto:alissa.simon@va.gov).

If you have non-technical questions or concerns please email:

- Dr. Laurie Zephyrin, Director of Reproductive Health, WVHSHG ([Laurie.Zephyrin@va.gov](mailto:Laurie.Zephyrin@va.gov)), or
- Dr. Chad Kessler, Section Chief Emergency Medicine, Jesse Brown VA Medical Center ([Chad.Kessler@va.gov](mailto:Chad.Kessler@va.gov)).

**We would like to start by asking for your personal information.**

Name:

Facility:

VISN:

Position:

**Are you either the ED Director for your facility, or were you designated by your facility's ED director to complete this survey?**

- Yes
- No => *If no, **STOP** this survey needs to be filled out by the facility's ED Director or his/her designee*

**These next questions are about equipment and supplies in your emergency department.**

**Please tell us about the following equipment in your ED.**

|                                                                                                                                     | How many are located within your ED? | How often is this supply sufficient to meet your ED's current demand? |                       |                       |                       |                       |
|-------------------------------------------------------------------------------------------------------------------------------------|--------------------------------------|-----------------------------------------------------------------------|-----------------------|-----------------------|-----------------------|-----------------------|
|                                                                                                                                     |                                      | Always                                                                | Most of the time      | Sometimes             | Rarely                | Never                 |
| Gynecologic examination tables (with stirrups)                                                                                      | <input type="text"/>                 | <input type="radio"/>                                                 | <input type="radio"/> | <input type="radio"/> | <input type="radio"/> | <input type="radio"/> |
| Supplemental lights for gynecologic examination (e.g., focused light source that is not hand-held. Do not include lighted specula.) | <input type="text"/>                 | <input type="radio"/>                                                 | <input type="radio"/> | <input type="radio"/> | <input type="radio"/> | <input type="radio"/> |

**Typically, when a provider in your ED needs the following equipment, which best describes its availability?**

|                                                                                               | Stocked in ED         | Available from a centralized supply source, but not stocked in ED | Not available         |
|-----------------------------------------------------------------------------------------------|-----------------------|-------------------------------------------------------------------|-----------------------|
| Specula                                                                                       | <input type="radio"/> | <input type="radio"/>                                             | <input type="radio"/> |
| Lighted specula                                                                               | <input type="radio"/> | <input type="radio"/>                                             | <input type="radio"/> |
| Large/extra large specula                                                                     | <input type="radio"/> | <input type="radio"/>                                             | <input type="radio"/> |
| Small/extra small specula                                                                     | <input type="radio"/> | <input type="radio"/>                                             | <input type="radio"/> |
| Gonorrhea/Chlamydia testing media/probes                                                      | <input type="radio"/> | <input type="radio"/>                                             | <input type="radio"/> |
| Vaginitis DNA probes (to detect Candida species, Gardnerella vaginalis, and Trichomonas)      | <input type="radio"/> | <input type="radio"/>                                             | <input type="radio"/> |
| Extra-large patient gowns                                                                     | <input type="radio"/> | <input type="radio"/>                                             | <input type="radio"/> |
| Pre-packaged gynecologic examination kit (at minimum containing speculum, lubrication, swabs) | <input type="radio"/> | <input type="radio"/>                                             | <input type="radio"/> |
| Pre-packaged obstetrics (delivery) kit                                                        | <input type="radio"/> | <input type="radio"/>                                             | <input type="radio"/> |

**Only answer for supplies that you indicate are available from a centralized supply source.**

Are these items available from a centralized supply source at all times (i.e. 24/7)?

|                                          | 24/7?                                              | If not 24/7, when is this item available?                                                                                                                                        |
|------------------------------------------|----------------------------------------------------|----------------------------------------------------------------------------------------------------------------------------------------------------------------------------------|
| Specula                                  | <input type="radio"/> Yes <input type="radio"/> No | <input type="checkbox"/> Weekdays <input type="checkbox"/> Evenings <input type="checkbox"/> Nights <input type="checkbox"/> Saturdays <input type="checkbox"/> Sundays/Holidays |
| Lighted Specula                          | <input type="radio"/> Yes <input type="radio"/> No | <input type="checkbox"/> Weekdays <input type="checkbox"/> Evenings <input type="checkbox"/> Nights <input type="checkbox"/> Saturdays <input type="checkbox"/> Sundays/Holidays |
| Large/extra large specula                | <input type="radio"/> Yes <input type="radio"/> No | <input type="checkbox"/> Weekdays <input type="checkbox"/> Evenings <input type="checkbox"/> Nights <input type="checkbox"/> Saturdays <input type="checkbox"/> Sundays/Holidays |
| Small/extra small specula                | <input type="radio"/> Yes <input type="radio"/> No | <input type="checkbox"/> Weekdays <input type="checkbox"/> Evenings <input type="checkbox"/> Nights <input type="checkbox"/> Saturdays <input type="checkbox"/> Sundays/Holidays |
| Gonorrhea/chlamydia testing media/probes | <input type="radio"/> Yes <input type="radio"/> No | <input type="checkbox"/> Weekdays <input type="checkbox"/> Evenings <input type="checkbox"/> Nights <input type="checkbox"/> Saturdays <input type="checkbox"/> Sundays/Holidays |
| Vaginitis DNA probes                     | <input type="radio"/> Yes <input type="radio"/> No | <input type="checkbox"/> Weekdays <input type="checkbox"/> Evenings <input type="checkbox"/> Nights <input type="checkbox"/> Saturdays <input type="checkbox"/> Sundays/Holidays |
| Extra large patient gowns                | <input type="radio"/> Yes <input type="radio"/> No | <input type="checkbox"/> Weekdays <input type="checkbox"/> Evenings <input type="checkbox"/> Nights <input type="checkbox"/> Saturdays <input type="checkbox"/> Sundays/Holidays |
| Pre-packaged gynecologic exam kit        | <input type="radio"/> Yes <input type="radio"/> No | <input type="checkbox"/> Weekdays <input type="checkbox"/> Evenings <input type="checkbox"/> Nights <input type="checkbox"/> Saturdays <input type="checkbox"/> Sundays/Holidays |
| Pre-packaged obstetrics kit              | <input type="radio"/> Yes <input type="radio"/> No | <input type="checkbox"/> Weekdays <input type="checkbox"/> Evenings <input type="checkbox"/> Nights <input type="checkbox"/> Saturdays <input type="checkbox"/> Sundays/Holidays |

**Only answer for supplies that you indicate are available from a centralized supply source.**

From the time of ordering, how long on average does it take for this item to arrive in the ED?

|                                     | < 30 mins             | 30-60 mins            | > 60 mins             | Not typically available |                              | < 30 mins             | 31-60 mins            | > 60 mins             | Not typically available |
|-------------------------------------|-----------------------|-----------------------|-----------------------|-------------------------|------------------------------|-----------------------|-----------------------|-----------------------|-------------------------|
| <u>Specula</u>                      |                       |                       |                       |                         | <u>L/XL specula</u>          |                       |                       |                       |                         |
| Daytime M-F                         | <input type="radio"/> | <input type="radio"/> | <input type="radio"/> | <input type="radio"/>   | Daytime M-F                  | <input type="radio"/> | <input type="radio"/> | <input type="radio"/> | <input type="radio"/>   |
| Nights/Weekends                     | <input type="radio"/> | <input type="radio"/> | <input type="radio"/> | <input type="radio"/>   | Nights/Weekends              | <input type="radio"/> | <input type="radio"/> | <input type="radio"/> | <input type="radio"/>   |
| <u>Lighted specula</u>              |                       |                       |                       |                         | <u>S/XS specula</u>          |                       |                       |                       |                         |
| Daytime M-F                         | <input type="radio"/> | <input type="radio"/> | <input type="radio"/> | <input type="radio"/>   | Daytime M-F                  | <input type="radio"/> | <input type="radio"/> | <input type="radio"/> | <input type="radio"/>   |
| Nights/Weekends                     | <input type="radio"/> | <input type="radio"/> | <input type="radio"/> | <input type="radio"/>   | Nights/Weekends              | <input type="radio"/> | <input type="radio"/> | <input type="radio"/> | <input type="radio"/>   |
| <u>GCN/Chl testing media/probes</u> |                       |                       |                       |                         | <u>Pre-packaged gyn kits</u> |                       |                       |                       |                         |
| Daytime M-F                         | <input type="radio"/> | <input type="radio"/> | <input type="radio"/> | <input type="radio"/>   | Daytime M-F                  | <input type="radio"/> | <input type="radio"/> | <input type="radio"/> | <input type="radio"/>   |
| Nights/Weekends                     | <input type="radio"/> | <input type="radio"/> | <input type="radio"/> | <input type="radio"/>   | Nights/Weekends              | <input type="radio"/> | <input type="radio"/> | <input type="radio"/> | <input type="radio"/>   |
| <u>Vaginitis DNA probes</u>         |                       |                       |                       |                         | <u>Pre-packaged ob kits</u>  |                       |                       |                       |                         |
| Daytime M-F                         | <input type="radio"/> | <input type="radio"/> | <input type="radio"/> | <input type="radio"/>   | Daytime M-F                  | <input type="radio"/> | <input type="radio"/> | <input type="radio"/> | <input type="radio"/>   |
| Nights/Weekends                     | <input type="radio"/> | <input type="radio"/> | <input type="radio"/> | <input type="radio"/>   | Nights/Weekends              | <input type="radio"/> | <input type="radio"/> | <input type="radio"/> | <input type="radio"/>   |
| <u>XL patient gowns</u>             |                       |                       |                       |                         |                              |                       |                       |                       |                         |
| Daytime M-F                         | <input type="radio"/> | <input type="radio"/> | <input type="radio"/> | <input type="radio"/>   |                              |                       |                       |                       |                         |
| Nights/Weekends                     | <input type="radio"/> | <input type="radio"/> | <input type="radio"/> | <input type="radio"/>   |                              |                       |                       |                       |                         |

**Does your ED have the following Point-Of-Care (POC) tests?**

*(POC tests are those in which the specimen collection and analysis are done at the site of care, i.e. within the ED)*

|                            | Yes                   | No                    |
|----------------------------|-----------------------|-----------------------|
| Urine dipstick             | <input type="radio"/> | <input type="radio"/> |
| Urine pregnancy test       | <input type="radio"/> | <input type="radio"/> |
| Hemoglobin                 | <input type="radio"/> | <input type="radio"/> |
| Troponin ( <i>i-stat</i> ) | <input type="radio"/> | <input type="radio"/> |
| Blood glucose              | <input type="radio"/> | <input type="radio"/> |

**OPTIONAL:**

**Use this space to comment on any answers in this section on ED equipment and supplies that you think need clarification.**

**This next section asks about the **layout** in your ED.**

**How many medical/surgical beds are currently in your ED?**  
*(Do not count psychiatric beds)*

**Of these medical/surgical ED beds, how many are located in private rooms?** *(We define private room as 1 bed in a room that has 4 solid walls or floor-to-ceiling partitions)*

**How many private medical/surgical examination rooms (separate from beds) are currently in your ED?**

**How many of your gynecologic examination tables are located in private rooms?** *Include both beds and exam rooms. Enter '0' if no gyn tables in your ED.*

**Which best describes your ED's treatment and examination area for patients who present primarily with psychiatric/mental health complaints?**

- No designated area in the ED for such patients
- Designated area(s) with one or more private rooms (not counting "containment" rooms)
- Designated area(s) where multiple patients are seen in a non-private space
- Other layout

"A containment room is one that locks from the outside and is used to contain a patient who is exhibiting violent or otherwise dangerous behavior.

*If "Other Layout, please describe:*

**Only answer if you have a designated area(s) where multiple psychiatric/mental health patients are seen in a non-private space**

**Within this designated area, is there a space where women with primary psychiatric/mental health presentations can be examined and treated separate from men, if needed?**

- Yes
- No

**OPTIONAL:**

**Use this space to comment on any answers in this section on ED layout that you think need clarification.**

↑  
↓

This third section is about **laboratory, blood bank, pharmacy and radiology services.**

Are the following laboratory/blood bank tests available, if needed by your ED?

|                             | Yes                   | No                    |
|-----------------------------|-----------------------|-----------------------|
| Urine pregnancy test        | <input type="radio"/> | <input type="radio"/> |
| Serum quantitative Beta-HCG | <input type="radio"/> | <input type="radio"/> |
| Rh-Factor screening         | <input type="radio"/> | <input type="radio"/> |

**Only answer for laboratory/blood bank tests you have available.**

Is this test available at all times (i.e. 24/7), if needed by your ED?

24/7? If not 24/7, when is this test *typically* available? Check all that apply.

|                             |                                                    |                                   |                                   |                                 |                                    |                                               |
|-----------------------------|----------------------------------------------------|-----------------------------------|-----------------------------------|---------------------------------|------------------------------------|-----------------------------------------------|
| Urine pregnancy test        | <input type="radio"/> Yes <input type="radio"/> No | <input type="checkbox"/> Weekdays | <input type="checkbox"/> Evenings | <input type="checkbox"/> Nights | <input type="checkbox"/> Saturdays | <input type="checkbox"/> Sundays/<br>Holidays |
| Serum quantitative Beta-HCG | <input type="radio"/> Yes <input type="radio"/> No | <input type="checkbox"/> Weekdays | <input type="checkbox"/> Evenings | <input type="checkbox"/> Nights | <input type="checkbox"/> Saturdays | <input type="checkbox"/> Sundays/<br>Holidays |
| Rh-Factor Screening         | <input type="radio"/> Yes <input type="radio"/> No | <input type="checkbox"/> Weekdays | <input type="checkbox"/> Evenings | <input type="checkbox"/> Nights | <input type="checkbox"/> Saturdays | <input type="checkbox"/> Sundays/<br>Holidays |

6

Which best describes the availability of the following medications, if needed by your ED?

|                                          | Stocked in ED         | Available from pharmacy, but not stocked in ED | Not available         |
|------------------------------------------|-----------------------|------------------------------------------------|-----------------------|
| Emergency Contraception (levonorgestrel) | <input type="radio"/> | <input type="radio"/>                          | <input type="radio"/> |
| Rho (D) Immune Globulin                  | <input type="radio"/> | <input type="radio"/>                          | <input type="radio"/> |

**Only answer for medications you have available.**

Is this medication available at all times (i.e. 24/7), if needed by your ED?

24/7? If not 24/7, when is this medication *typically* available? Check all that apply.

|                         |                                                    |                                   |                                   |                                 |                                    |                                               |
|-------------------------|----------------------------------------------------|-----------------------------------|-----------------------------------|---------------------------------|------------------------------------|-----------------------------------------------|
| Emergency contraception | <input type="radio"/> Yes <input type="radio"/> No | <input type="checkbox"/> Weekdays | <input type="checkbox"/> Evenings | <input type="checkbox"/> Nights | <input type="checkbox"/> Saturday  | <input type="checkbox"/> Sunday/<br>Holidays  |
| Rho (D) Immune Globulin | <input type="radio"/> Yes <input type="radio"/> No | <input type="checkbox"/> Weekdays | <input type="checkbox"/> Evenings | <input type="checkbox"/> Nights | <input type="checkbox"/> Saturdays | <input type="checkbox"/> Sundays/<br>Holidays |

**Are the following radiology services available, if needed by your ED?**

|                                                                                              | Yes                   | No                    |
|----------------------------------------------------------------------------------------------|-----------------------|-----------------------|
| Pelvic (including transvaginal) ultrasound performed by a licensed technician or radiologist | <input type="radio"/> | <input type="radio"/> |
| Attending radiologist review of ultrasound images                                            | <input type="radio"/> | <input type="radio"/> |
| Resident radiologist review of ultrasound images                                             | <input type="radio"/> | <input type="radio"/> |

**Only answer for services you have available.**

Is this service available at all times (i.e. 24/7), if needed by your ED?

24/7? If not 24/7, when is this service typically available? Check all that apply.

|                                                                            |                                                    |                                                                                                                                                                                  |
|----------------------------------------------------------------------------|----------------------------------------------------|----------------------------------------------------------------------------------------------------------------------------------------------------------------------------------|
| Pelvic ultrasound performed by a <u>licensed technician or radiologist</u> | <input type="radio"/> Yes <input type="radio"/> No | <input type="checkbox"/> Weekdays <input type="checkbox"/> Evenings <input type="checkbox"/> Nights <input type="checkbox"/> Saturdays <input type="checkbox"/> Sundays/Holidays |
| Ultrasound image review by <u>attending radiologist</u>                    | <input type="radio"/> Yes <input type="radio"/> No | <input type="checkbox"/> Weekdays <input type="checkbox"/> Evenings <input type="checkbox"/> Nights <input type="checkbox"/> Saturdays <input type="checkbox"/> Sundays/Holidays |
| Ultrasound image review by <u>resident</u>                                 | <input type="radio"/> Yes <input type="radio"/> No | <input type="checkbox"/> Weekdays <input type="checkbox"/> Evenings <input type="checkbox"/> Nights <input type="checkbox"/> Saturdays <input type="checkbox"/> Sundays/Holidays |

**OPTIONAL:**

Use this space to comment on any answers in this section on **laboratory, blood bank, pharmacy and radiology services** that you think need clarification.

Now we would like to ask about **consultations within your ED.**

Does your ED have arrangements in place for obtaining emergent consultations (in-person, in the ED) from the following specialties?

|                          | Yes, through a Service Agreement* | Yes, through an informal or other type of arrangement | No, consultation not available |
|--------------------------|-----------------------------------|-------------------------------------------------------|--------------------------------|
| Gynecology               | <input type="radio"/>             | <input type="radio"/>                                 | <input type="radio"/>          |
| Obstetrics               | <input type="radio"/>             | <input type="radio"/>                                 | <input type="radio"/>          |
| Psychiatry/Mental Health | <input type="radio"/>             | <input type="radio"/>                                 | <input type="radio"/>          |
| Cardiology               | <input type="radio"/>             | <input type="radio"/>                                 | <input type="radio"/>          |
| Nephrology               | <input type="radio"/>             | <input type="radio"/>                                 | <input type="radio"/>          |
| Neurology                | <input type="radio"/>             | <input type="radio"/>                                 | <input type="radio"/>          |
| Orthopedics              | <input type="radio"/>             | <input type="radio"/>                                 | <input type="radio"/>          |
| General Surgery          | <input type="radio"/>             | <input type="radio"/>                                 | <input type="radio"/>          |
| Urology                  | <input type="radio"/>             | <input type="radio"/>                                 | <input type="radio"/>          |
| Neurosurgery             | <input type="radio"/>             | <input type="radio"/>                                 | <input type="radio"/>          |

\*NOTE: Only include **service agreements** signed by service chiefs that outline policies, procedures and responsibilities for obtaining emergent consultation from this specialty.

**Only answer for consultation services that are available to your ED.**

When are the following consultative services available, if needed by your ED?

| <u>Gynecology</u>                    |                      | Always                | Sometimes             | Rarely                | Never                 |
|--------------------------------------|----------------------|-----------------------|-----------------------|-----------------------|-----------------------|
| W<br>E<br>E<br>K<br>D<br>A<br>Y<br>S | Daytime              | <input type="radio"/> | <input type="radio"/> | <input type="radio"/> | <input type="radio"/> |
|                                      | Evening              | <input type="radio"/> | <input type="radio"/> | <input type="radio"/> | <input type="radio"/> |
|                                      | Nights               | <input type="radio"/> | <input type="radio"/> | <input type="radio"/> | <input type="radio"/> |
|                                      | Saturdays            | <input type="radio"/> | <input type="radio"/> | <input type="radio"/> | <input type="radio"/> |
|                                      | Sundays/<br>Holidays | <input type="radio"/> | <input type="radio"/> | <input type="radio"/> | <input type="radio"/> |

| <u>Obstetrics</u>                    |                      | Always                | Sometimes             | Rarely                | Never                 |
|--------------------------------------|----------------------|-----------------------|-----------------------|-----------------------|-----------------------|
| W<br>E<br>E<br>K<br>D<br>A<br>Y<br>S | Daytime              | <input type="radio"/> | <input type="radio"/> | <input type="radio"/> | <input type="radio"/> |
|                                      | Evening              | <input type="radio"/> | <input type="radio"/> | <input type="radio"/> | <input type="radio"/> |
|                                      | Nights               | <input type="radio"/> | <input type="radio"/> | <input type="radio"/> | <input type="radio"/> |
|                                      | Saturdays            | <input type="radio"/> | <input type="radio"/> | <input type="radio"/> | <input type="radio"/> |
|                                      | Sundays/<br>Holidays | <input type="radio"/> | <input type="radio"/> | <input type="radio"/> | <input type="radio"/> |



| <u>Psych/MH</u>                      |                      | Always                | Sometimes             | Rarely                | Never                 |
|--------------------------------------|----------------------|-----------------------|-----------------------|-----------------------|-----------------------|
| W<br>E<br>E<br>K<br>D<br>A<br>Y<br>S | Daytime              | <input type="radio"/> | <input type="radio"/> | <input type="radio"/> | <input type="radio"/> |
|                                      | Evening              | <input type="radio"/> | <input type="radio"/> | <input type="radio"/> | <input type="radio"/> |
|                                      | Nights               | <input type="radio"/> | <input type="radio"/> | <input type="radio"/> | <input type="radio"/> |
|                                      | Saturdays            | <input type="radio"/> | <input type="radio"/> | <input type="radio"/> | <input type="radio"/> |
|                                      | Sundays/<br>Holidays | <input type="radio"/> | <input type="radio"/> | <input type="radio"/> | <input type="radio"/> |

| <u>Cardiology</u>                    |                      | Always                | Sometimes             | Rarely                | Never                 |
|--------------------------------------|----------------------|-----------------------|-----------------------|-----------------------|-----------------------|
| W<br>E<br>E<br>K<br>D<br>A<br>Y<br>S | Daytime              | <input type="radio"/> | <input type="radio"/> | <input type="radio"/> | <input type="radio"/> |
|                                      | Evening              | <input type="radio"/> | <input type="radio"/> | <input type="radio"/> | <input type="radio"/> |
|                                      | Nights               | <input type="radio"/> | <input type="radio"/> | <input type="radio"/> | <input type="radio"/> |
|                                      | Saturdays            | <input type="radio"/> | <input type="radio"/> | <input type="radio"/> | <input type="radio"/> |
|                                      | Sundays/<br>Holidays | <input type="radio"/> | <input type="radio"/> | <input type="radio"/> | <input type="radio"/> |

| <u>Nephrology</u>                    |                      | Always                | Sometimes             | Rarely                | Never                 |
|--------------------------------------|----------------------|-----------------------|-----------------------|-----------------------|-----------------------|
| W<br>E<br>E<br>K<br>D<br>A<br>Y<br>S | Daytime              | <input type="radio"/> | <input type="radio"/> | <input type="radio"/> | <input type="radio"/> |
|                                      | Evening              | <input type="radio"/> | <input type="radio"/> | <input type="radio"/> | <input type="radio"/> |
|                                      | Nights               | <input type="radio"/> | <input type="radio"/> | <input type="radio"/> | <input type="radio"/> |
|                                      | Saturdays            | <input type="radio"/> | <input type="radio"/> | <input type="radio"/> | <input type="radio"/> |
|                                      | Sundays/<br>Holidays | <input type="radio"/> | <input type="radio"/> | <input type="radio"/> | <input type="radio"/> |

| <u>Neurology</u>                     |                      | Always                | Sometimes             | Rarely                | Never                 |
|--------------------------------------|----------------------|-----------------------|-----------------------|-----------------------|-----------------------|
| W<br>E<br>E<br>K<br>D<br>A<br>Y<br>S | Daytime              | <input type="radio"/> | <input type="radio"/> | <input type="radio"/> | <input type="radio"/> |
|                                      | Evening              | <input type="radio"/> | <input type="radio"/> | <input type="radio"/> | <input type="radio"/> |
|                                      | Nights               | <input type="radio"/> | <input type="radio"/> | <input type="radio"/> | <input type="radio"/> |
|                                      | Saturdays            | <input type="radio"/> | <input type="radio"/> | <input type="radio"/> | <input type="radio"/> |
|                                      | Sundays/<br>Holidays | <input type="radio"/> | <input type="radio"/> | <input type="radio"/> | <input type="radio"/> |

| <u>Orthopedics</u>                   |                  | Always                | Sometimes             | Rarely                | Never                 |
|--------------------------------------|------------------|-----------------------|-----------------------|-----------------------|-----------------------|
| W<br>E<br>E<br>K<br>D<br>A<br>Y<br>S | Daytime          | <input type="radio"/> | <input type="radio"/> | <input type="radio"/> | <input type="radio"/> |
|                                      | Evening          | <input type="radio"/> | <input type="radio"/> | <input type="radio"/> | <input type="radio"/> |
|                                      | Nights           | <input type="radio"/> | <input type="radio"/> | <input type="radio"/> | <input type="radio"/> |
|                                      | Saturdays        | <input type="radio"/> | <input type="radio"/> | <input type="radio"/> | <input type="radio"/> |
|                                      | Sundays/Holidays | <input type="radio"/> | <input type="radio"/> | <input type="radio"/> | <input type="radio"/> |

| <u>General Surgery</u>               |                  | Always                | Sometimes             | Rarely                | Never                 |
|--------------------------------------|------------------|-----------------------|-----------------------|-----------------------|-----------------------|
| W<br>E<br>E<br>K<br>D<br>A<br>Y<br>S | Daytime          | <input type="radio"/> | <input type="radio"/> | <input type="radio"/> | <input type="radio"/> |
|                                      | Evening          | <input type="radio"/> | <input type="radio"/> | <input type="radio"/> | <input type="radio"/> |
|                                      | Nights           | <input type="radio"/> | <input type="radio"/> | <input type="radio"/> | <input type="radio"/> |
|                                      | Saturdays        | <input type="radio"/> | <input type="radio"/> | <input type="radio"/> | <input type="radio"/> |
|                                      | Sundays/Holidays | <input type="radio"/> | <input type="radio"/> | <input type="radio"/> | <input type="radio"/> |

| <u>Urology</u>                       |                  | Always                | Sometimes             | Rarely                | Never                 |
|--------------------------------------|------------------|-----------------------|-----------------------|-----------------------|-----------------------|
| W<br>E<br>E<br>K<br>D<br>A<br>Y<br>S | Daytime          | <input type="radio"/> | <input type="radio"/> | <input type="radio"/> | <input type="radio"/> |
|                                      | Evening          | <input type="radio"/> | <input type="radio"/> | <input type="radio"/> | <input type="radio"/> |
|                                      | Nights           | <input type="radio"/> | <input type="radio"/> | <input type="radio"/> | <input type="radio"/> |
|                                      | Saturdays        | <input type="radio"/> | <input type="radio"/> | <input type="radio"/> | <input type="radio"/> |
|                                      | Sundays/Holidays | <input type="radio"/> | <input type="radio"/> | <input type="radio"/> | <input type="radio"/> |

| <u>Neurosurgery</u>                  |                  | Always                | Sometimes             | Rarely                | Never                 |
|--------------------------------------|------------------|-----------------------|-----------------------|-----------------------|-----------------------|
| W<br>E<br>E<br>K<br>D<br>A<br>Y<br>S | Daytime          | <input type="radio"/> | <input type="radio"/> | <input type="radio"/> | <input type="radio"/> |
|                                      | Evening          | <input type="radio"/> | <input type="radio"/> | <input type="radio"/> | <input type="radio"/> |
|                                      | Nights           | <input type="radio"/> | <input type="radio"/> | <input type="radio"/> | <input type="radio"/> |
|                                      | Saturdays        | <input type="radio"/> | <input type="radio"/> | <input type="radio"/> | <input type="radio"/> |
|                                      | Sundays/Holidays | <input type="radio"/> | <input type="radio"/> | <input type="radio"/> | <input type="radio"/> |

**Only answer for services that you indicated were not “Always” available at all times (24/7).**

**Is there an alternative service that cross-covers emergent consultations when this specialty service is not available for in-person, on-site consultation?** (e.g., general surgery covering gynecologic emergencies).

|                            |                                                    |                                       |
|----------------------------|----------------------------------------------------|---------------------------------------|
| <b>Gynecology</b>          | <input type="radio"/> Yes <input type="radio"/> No | Specify service: <input type="text"/> |
| <b>Obstetrics</b>          | <input type="radio"/> Yes <input type="radio"/> No | Specify service: <input type="text"/> |
| <b>Psych/Mental Health</b> | <input type="radio"/> Yes <input type="radio"/> No | Specify service: <input type="text"/> |
| <b>Cardiology</b>          | <input type="radio"/> Yes <input type="radio"/> No | Specify service: <input type="text"/> |
| <b>Nephrology</b>          | <input type="radio"/> Yes <input type="radio"/> No | Specify service: <input type="text"/> |
| <b>Neurology</b>           | <input type="radio"/> Yes <input type="radio"/> No | Specify service: <input type="text"/> |
| <b>Orthopedics</b>         | <input type="radio"/> Yes <input type="radio"/> No | Specify service: <input type="text"/> |
| <b>General Surgery</b>     | <input type="radio"/> Yes <input type="radio"/> No | Specify service: <input type="text"/> |
| <b>Urology</b>             | <input type="radio"/> Yes <input type="radio"/> No | Specify service: <input type="text"/> |
| <b>Neurosurgery</b>        | <input type="radio"/> Yes <input type="radio"/> No | Specify service: <input type="text"/> |

10

**OPTIONAL:**

**Use this space to comment on any answers in this section on **consultations within your ED** that you think need clarification.**

These next few questions are about **patient transfers** from your ED.

Are there one or more written documents, either in use or being drafted, that outline policies and procedures for the transfer of patients needing care that exceeds your ED's capabilities?

- Yes, document(s) in use or being drafted
- No, document(s) neither in use nor being drafted

**Only answer if you have one or more written documents in use or being drafted.**

Do any of these documents include policies or procedures that specifically pertain to the transfer of patients with the following types of emergencies?

|                                                         | Document(s) in use currently <i>include</i> policies/procedures for this type of emergency | Policies/procedures for this type of emergency currently <i>being drafted</i> | Policies/procedures for this type of emergency neither in use nor being drafted |
|---------------------------------------------------------|--------------------------------------------------------------------------------------------|-------------------------------------------------------------------------------|---------------------------------------------------------------------------------|
| Gynecologic emergencies                                 | <input type="radio"/>                                                                      | <input type="radio"/>                                                         | <input type="radio"/>                                                           |
| Obstetric emergencies                                   | <input type="radio"/>                                                                      | <input type="radio"/>                                                         | <input type="radio"/>                                                           |
| Psychiatric emergencies                                 | <input type="radio"/>                                                                      | <input type="radio"/>                                                         | <input type="radio"/>                                                           |
| Cardiac emergencies                                     | <input type="radio"/>                                                                      | <input type="radio"/>                                                         | <input type="radio"/>                                                           |
| Neurologic emergencies                                  | <input type="radio"/>                                                                      | <input type="radio"/>                                                         | <input type="radio"/>                                                           |
| Non-gynecologic surgical emergencies (including trauma) | <input type="radio"/>                                                                      | <input type="radio"/>                                                         | <input type="radio"/>                                                           |

Does your ED or facility have a written agreement with another institution for automatic or expedited acceptance of VA patients with the following emergencies?

|                                      | Agreement currently in effect | Agreement in progress | Agreement neither in effect or in progress |
|--------------------------------------|-------------------------------|-----------------------|--------------------------------------------|
| Gynecologic emergencies              | <input type="radio"/>         | <input type="radio"/> | <input type="radio"/>                      |
| Obstetric emergencies                | <input type="radio"/>         | <input type="radio"/> | <input type="radio"/>                      |
| Psychiatric emergencies              | <input type="radio"/>         | <input type="radio"/> | <input type="radio"/>                      |
| Cardiac emergencies                  | <input type="radio"/>         | <input type="radio"/> | <input type="radio"/>                      |
| Neurologic emergencies               | <input type="radio"/>         | <input type="radio"/> | <input type="radio"/>                      |
| Non-gynecologic surgical emergencies | <input type="radio"/>         | <input type="radio"/> | <input type="radio"/>                      |

**OPTIONAL:**

Use this space to comment on any answers in this section on **patient transfers** that you think need clarification.

**Questions in this section are about **standing orders** used in your ED.**

*Standing orders are pre-established orders or ordersets that may be carried out by nurses or other staff under specific conditions without consulting a physician.*

**Does your ED have standing orders for the following tests?**

|                                   | Standing order currently in use | Use of standing order planned, but not yet implemented | Standing order neither in use nor planned |
|-----------------------------------|---------------------------------|--------------------------------------------------------|-------------------------------------------|
| EKG                               | <input type="radio"/>           | <input type="radio"/>                                  | <input type="radio"/>                     |
| Hemoglobin/hematocrit measurement | <input type="radio"/>           | <input type="radio"/>                                  | <input type="radio"/>                     |
| Urinalysis                        | <input type="radio"/>           | <input type="radio"/>                                  | <input type="radio"/>                     |
| Urine pregnancy test              | <input type="radio"/>           | <input type="radio"/>                                  | <input type="radio"/>                     |
| Fingerstick glucose test          | <input type="radio"/>           | <input type="radio"/>                                  | <input type="radio"/>                     |

**Does your ED have standing ordersets for the following signs/symptoms?**

|                  | Yes, orderset currently in use | No, use of orderset is planned but not yet implemented | No, orderset neither in use nor pending |
|------------------|--------------------------------|--------------------------------------------------------|-----------------------------------------|
| Abdominal pain   | <input type="radio"/>          | <input type="radio"/>                                  | <input type="radio"/>                   |
| Chest pain       | <input type="radio"/>          | <input type="radio"/>                                  | <input type="radio"/>                   |
| Signs of stroke  | <input type="radio"/>          | <input type="radio"/>                                  | <input type="radio"/>                   |
| Vaginal bleeding | <input type="radio"/>          | <input type="radio"/>                                  | <input type="radio"/>                   |

**Only answer if your ED has standing ordersets for abdominal and/or vaginal bleeding, respectively.**

**Does this orderset for abdominal pain include an order for urine pregnancy test in women?**

- Yes
- No

**Does this orderset for vaginal bleeding include an order for urine pregnancy test?**

- Yes
- No

**OPTIONAL:**

Use this space to comment on any answers in this section on **standing orders** that you think need clarification.

Now we ask about use of CPRS note templates.

Do your ED nurses routinely enter triage notes into CPRS using a template?

- Yes
- No

Does this triage note template designate a space for the triage nurse to document patient responses to an intimate partner violence screening question? (e.g., "Do you feel safe at home?")

- Yes
- No

Does this triage note template designate a space for the triage nurse to document last menstrual period in all female patients?

- Yes
- No

**Only answer if your ED nurses routinely enter triage notes into CPRS using a template.**

Do your ED nurses use CPRS *specialized* note templates to assist in documenting pertinent information when triaging patients with the following signs or symptoms?

|                          | Yes, used frequently  | Yes, used infrequently | No, use planned but note template not yet available | No plans to use note template |
|--------------------------|-----------------------|------------------------|-----------------------------------------------------|-------------------------------|
| Abdominal pain           | <input type="radio"/> | <input type="radio"/>  | <input type="radio"/>                               | <input type="radio"/>         |
| Chest pain               | <input type="radio"/> | <input type="radio"/>  | <input type="radio"/>                               | <input type="radio"/>         |
| Signs of stroke          | <input type="radio"/> | <input type="radio"/>  | <input type="radio"/>                               | <input type="radio"/>         |
| Vaginal bleeding         | <input type="radio"/> | <input type="radio"/>  | <input type="radio"/>                               | <input type="radio"/>         |
| Vaginal discharge        | <input type="radio"/> | <input type="radio"/>  | <input type="radio"/>                               | <input type="radio"/>         |
| Mental health complaints | <input type="radio"/> | <input type="radio"/>  | <input type="radio"/>                               | <input type="radio"/>         |

**Only answer if your ED nurses use a template for abdominal pain and/or vaginal bleeding, respectively.**

Does this specialized CPRS note template for abdominal pain designate a space for the triage nurse to document last menstrual period in women?

- Yes
- No

Does this specialized CPRS note template for vaginal bleeding designate a space for the triage nurse to document last menstrual period?

- Yes
- No

Do your ED clinicians (i.e. physicians and mid-level practitioners) use a *specialized* CPRS note template to document clinical information about patients presenting with the following?

|                                    | Yes, used frequently  | Yes, used infrequently | No, use planned but note template not yet available | No plans to use note template |
|------------------------------------|-----------------------|------------------------|-----------------------------------------------------|-------------------------------|
| Abdominal pain                     | <input type="radio"/> | <input type="radio"/>  | <input type="radio"/>                               | <input type="radio"/>         |
| Chest pain/acute coronary syndrome | <input type="radio"/> | <input type="radio"/>  | <input type="radio"/>                               | <input type="radio"/>         |
| Signs of stroke                    | <input type="radio"/> | <input type="radio"/>  | <input type="radio"/>                               | <input type="radio"/>         |
| Vaginal bleeding                   | <input type="radio"/> | <input type="radio"/>  | <input type="radio"/>                               | <input type="radio"/>         |
| Vaginal discharge                  | <input type="radio"/> | <input type="radio"/>  | <input type="radio"/>                               | <input type="radio"/>         |
| Mental health complaints           | <input type="radio"/> | <input type="radio"/>  | <input type="radio"/>                               | <input type="radio"/>         |
| Intimate partner violence          | <input type="radio"/> | <input type="radio"/>  | <input type="radio"/>                               | <input type="radio"/>         |
| Congestive heart failure           | <input type="radio"/> | <input type="radio"/>  | <input type="radio"/>                               | <input type="radio"/>         |
| Cerebrovascular accident           | <input type="radio"/> | <input type="radio"/>  | <input type="radio"/>                               | <input type="radio"/>         |

**Only answer if your ED clinicians use specialized clinician note templates for abdominal pain and/or vaginal bleeding, respectively.**

**Does this specialized CPRS note template for abdominal pain designate a space for the clinician to document last menstrual period?**

- Yes
- No

**Does this specialized CPRS note template for vaginal bleeding designate a space for the clinician to document last menstrual period?**

- Yes
- No

**Do your ED clinicians use CPRS ordersets to guide the evaluation and/or management of the following?**

|                                           | Yes, used frequently  | Yes, used infrequently | No, use planned but orderset not yet available | No plans to use orderset |
|-------------------------------------------|-----------------------|------------------------|------------------------------------------------|--------------------------|
| Vaginal bleeding, positive pregnancy test | <input type="radio"/> | <input type="radio"/>  | <input type="radio"/>                          | <input type="radio"/>    |
| Vaginal bleeding, negative pregnancy test | <input type="radio"/> | <input type="radio"/>  | <input type="radio"/>                          | <input type="radio"/>    |
| Pelvic inflammatory disease               | <input type="radio"/> | <input type="radio"/>  | <input type="radio"/>                          | <input type="radio"/>    |
| Pelvic/lower abdominal pain in a female   | <input type="radio"/> | <input type="radio"/>  | <input type="radio"/>                          | <input type="radio"/>    |
| Urinary tract infection                   | <input type="radio"/> | <input type="radio"/>  | <input type="radio"/>                          | <input type="radio"/>    |
| Chest pain/acute coronary syndrome        | <input type="radio"/> | <input type="radio"/>  | <input type="radio"/>                          | <input type="radio"/>    |
| Community acquired pneumonia              | <input type="radio"/> | <input type="radio"/>  | <input type="radio"/>                          | <input type="radio"/>    |
| Cerebrovascular accident                  | <input type="radio"/> | <input type="radio"/>  | <input type="radio"/>                          | <input type="radio"/>    |

**OPTIONAL:**

**Use this space to comment on any answers in this section on CPRS note templates that you think need clarification.**

The following questions are about **your ED's care for victims of acute sexual assault.**

Does your ED transfer victims of acute sexual assault to one or more institutions that provide comprehensive assessment and treatment for sexual assault?

- Yes
- No

**Only answer if your ED transfers victims of acute sexual assault.**

When do these transfers occur?

|                                      |                  | Always                | Sometimes             | Rarely                | Never                 |
|--------------------------------------|------------------|-----------------------|-----------------------|-----------------------|-----------------------|
| W<br>E<br>E<br>K<br>D<br>A<br>Y<br>S | Daytime          | <input type="radio"/> | <input type="radio"/> | <input type="radio"/> | <input type="radio"/> |
|                                      | Evening          | <input type="radio"/> | <input type="radio"/> | <input type="radio"/> | <input type="radio"/> |
|                                      | Nights           | <input type="radio"/> | <input type="radio"/> | <input type="radio"/> | <input type="radio"/> |
|                                      | Saturdays        | <input type="radio"/> | <input type="radio"/> | <input type="radio"/> | <input type="radio"/> |
|                                      | Sundays/Holidays | <input type="radio"/> | <input type="radio"/> | <input type="radio"/> | <input type="radio"/> |

**Only answer if your ED does not “Always” transfer victim of acute sexual assault, at all times on weekdays and weekends (e.g., 24/7)**

Does your ED have a formal arrangement or contract for obtaining the following services while a patient is in the ED?

|                                                                                                                                                                 | Yes                   | No                    |
|-----------------------------------------------------------------------------------------------------------------------------------------------------------------|-----------------------|-----------------------|
| Consultation from a Rape Crisis Center, a Sexual Assault Nurse Examiner (SANE) unit, or other organization with expertise in the issues of acute sexual assault | <input type="radio"/> | <input type="radio"/> |
| On-site services from at least one practitioner (VA or non-VA) trained in conducting forensic evidentiary examination for acute sexual assault                  | <input type="radio"/> | <input type="radio"/> |
| Mental health services from a practitioner (MD, Psy.D or LCSW) trained in supporting victims of acute sexual assault                                            | <input type="radio"/> | <input type="radio"/> |



**Only answer for the services you indicated in the previous question as available to your ED.**

**When is this service available?**

**Consultation from a Rape Crisis Center, SANE unit, or other organization:**

|                                      |                  | Always                | Sometimes             | Rarely                | Never                 |
|--------------------------------------|------------------|-----------------------|-----------------------|-----------------------|-----------------------|
| W<br>E<br>E<br>K<br>D<br>A<br>Y<br>S | Daytime          | <input type="radio"/> | <input type="radio"/> | <input type="radio"/> | <input type="radio"/> |
|                                      | Evening          | <input type="radio"/> | <input type="radio"/> | <input type="radio"/> | <input type="radio"/> |
|                                      | Nights           | <input type="radio"/> | <input type="radio"/> | <input type="radio"/> | <input type="radio"/> |
|                                      | Saturdays        | <input type="radio"/> | <input type="radio"/> | <input type="radio"/> | <input type="radio"/> |
|                                      | Sundays/Holidays | <input type="radio"/> | <input type="radio"/> | <input type="radio"/> | <input type="radio"/> |

**On-site services from a practitioner trained to conduct forensic evidentiary examinations:**

|                                      |                  | Always                | Sometimes             | Rarely                | Never                 |
|--------------------------------------|------------------|-----------------------|-----------------------|-----------------------|-----------------------|
| W<br>E<br>E<br>K<br>D<br>A<br>Y<br>S | Daytime          | <input type="radio"/> | <input type="radio"/> | <input type="radio"/> | <input type="radio"/> |
|                                      | Evening          | <input type="radio"/> | <input type="radio"/> | <input type="radio"/> | <input type="radio"/> |
|                                      | Nights           | <input type="radio"/> | <input type="radio"/> | <input type="radio"/> | <input type="radio"/> |
|                                      | Saturdays        | <input type="radio"/> | <input type="radio"/> | <input type="radio"/> | <input type="radio"/> |
|                                      | Sundays/Holidays | <input type="radio"/> | <input type="radio"/> | <input type="radio"/> | <input type="radio"/> |

**When is this service available?**

**Mental health services from a sexual trauma specialist (MD, Psy.D or LCSW):**

|                                      |                  | Always                | Sometimes             | Rarely                | Never                 |
|--------------------------------------|------------------|-----------------------|-----------------------|-----------------------|-----------------------|
| W<br>E<br>E<br>K<br>D<br>A<br>Y<br>S | Daytime          | <input type="radio"/> | <input type="radio"/> | <input type="radio"/> | <input type="radio"/> |
|                                      | Evening          | <input type="radio"/> | <input type="radio"/> | <input type="radio"/> | <input type="radio"/> |
|                                      | Nights           | <input type="radio"/> | <input type="radio"/> | <input type="radio"/> | <input type="radio"/> |
|                                      | Saturdays        | <input type="radio"/> | <input type="radio"/> | <input type="radio"/> | <input type="radio"/> |
|                                      | Sundays/Holidays | <input type="radio"/> | <input type="radio"/> | <input type="radio"/> | <input type="radio"/> |

**Only answer if your ED does not “Always” transfer victims of acute sexual assault, at all times on weekdays and weekends (e.g., 24/7).**

Do your ED clinicians use note templates to assist in documenting pertinent information for evaluating and treating victims of acute sexual assault?

Yes  No

Does your ED have a written protocol guiding the examination and treatment of victims of acute sexual assault?

Yes  No

Does your ED have a written protocol guiding the collection of evidence, including specifications about its chain of custody, in cases of acute sexual assault?

Yes  No

Does your ED have access to sexual assault evidence collection kits (either in stock, from a centralized supply source, or from local law enforcement) that have, at minimum, containers for patients' clothing and underwear, vaginal/cervical/oral swabs and smears, and materials for collecting hair evidence?

Yes  No

**Only answer if your ED has sexual assault evidence collection kits available. Only answer the question for when the kit is typically available if it is not available 24/7.**

Is this sexual assault evidence collection kit available at all times (i.e. 24/7), if needed by your ED?

24/7?

If not 24/7, when is this kit *typically* available? Check all that apply

Yes  No

Weekdays

Evenings

Nights

Saturday

Sunday/  
Holidays

Does your ED have a mechanism for obtaining urgent follow-up with a mental health practitioner (MD, Psy.D or LCSW) trained in supporting victims of acute sexual assault?

- Yes
- No

**Only answer if your ED is able to obtain urgent mental health follow-up for sexual assault victims**

**In what timeframe does this follow-up mental health visit generally occur?**

- Within 24 hours
- Between 24-47 hours
- Between 48-71 hours
- Between 3 days and 1 week
- More than 1 week

**OPTIONAL:**

**Use this space to comment on any answers in this section on your ED's care for victims of sexual assault that you think need clarification.**

**This last section is about ED follow-up.**

**Which of the following services are available for follow-up for patients in your healthcare system?**

- Primary Care within VA
- Primary Care contract care (outside VA)
- Women's Health Clinic
- OB/GYN care within VA
- OB/GYN contract care (outside VA)
- Psych/MH within VA
- Psych/MH contract care (outside VA)
- Other Specialties within VA
- Other Specialties contract care (outside VA)

**Answer only for services that are available for follow-up in your healthcare system.**

**When a patient needs urgent follow-up (e.g. within one week of their ED visit), what mechanisms does your ED commonly use to schedule each of the following services?**

|                                                       | Check all that apply             |                                  |                                                                  |                                    |
|-------------------------------------------------------|----------------------------------|----------------------------------|------------------------------------------------------------------|------------------------------------|
|                                                       | Have the patient call the clinic | Have the clinic call the patient | Directly schedule the follow-up before the patient leaves the ER | Another mechanism (describe below) |
| Primary Care <u>within VA</u>                         | <input type="checkbox"/>         | <input type="checkbox"/>         | <input type="checkbox"/>                                         | <input type="checkbox"/>           |
| Primary Care contract care ( <u>outside VA</u> )      | <input type="checkbox"/>         | <input type="checkbox"/>         | <input type="checkbox"/>                                         | <input type="checkbox"/>           |
| Women's Health Clinic                                 | <input type="checkbox"/>         | <input type="checkbox"/>         | <input type="checkbox"/>                                         | <input type="checkbox"/>           |
| OB/GYN care <u>within VA</u>                          | <input type="checkbox"/>         | <input type="checkbox"/>         | <input type="checkbox"/>                                         | <input type="checkbox"/>           |
| OB/GYN contract care ( <u>outside VA</u> )            | <input type="checkbox"/>         | <input type="checkbox"/>         | <input type="checkbox"/>                                         | <input type="checkbox"/>           |
| Psych/MH <u>within VA</u>                             | <input type="checkbox"/>         | <input type="checkbox"/>         | <input type="checkbox"/>                                         | <input type="checkbox"/>           |
| Psych/MH contract care ( <u>outside VA</u> )          | <input type="checkbox"/>         | <input type="checkbox"/>         | <input type="checkbox"/>                                         | <input type="checkbox"/>           |
| Other Specialties <u>within VA</u>                    | <input type="checkbox"/>         | <input type="checkbox"/>         | <input type="checkbox"/>                                         | <input type="checkbox"/>           |
| Other Specialties contract care ( <u>outside VA</u> ) | <input type="checkbox"/>         | <input type="checkbox"/>         | <input type="checkbox"/>                                         | <input type="checkbox"/>           |

**Describe other mechanisms your ED uses to arrange urgent follow-up, when needed.**

**Answer only for services that are available for follow-up in your healthcare system.**

**In general, how difficult is it to obtain urgent (e.g., within one week) post-ED follow-up with the following services?**

|                                                       | Not at all difficult  | Slightly difficult    | Moderately difficult  | Very difficult        | Extremely difficult   |
|-------------------------------------------------------|-----------------------|-----------------------|-----------------------|-----------------------|-----------------------|
| Primary Care <u>within VA</u>                         | <input type="radio"/> |
| Primary Care contract care ( <u>outside VA</u> )      | <input type="radio"/> |
| Women's Health Clinic                                 | <input type="radio"/> |
| OB/GYN care <u>within VA</u>                          | <input type="radio"/> |
| OB/GYN contract care ( <u>outside VA</u> )            | <input type="radio"/> |
| Psych/MH <u>within VA</u>                             | <input type="radio"/> |
| Psych/MH contract care ( <u>outside VA</u> )          | <input type="radio"/> |
| Other Specialties <u>within VA</u>                    | <input type="radio"/> |
| Other Specialties contract care ( <u>outside VA</u> ) | <input type="radio"/> |

**For female patients requiring psychiatry or mental health follow-up, in general, how difficult is it to obtain timely follow-up with same-gender providers, if requested?**

- Not at all difficult
- Slightly difficult
- Moderately difficult
- Very difficult
- Extremely difficult

**Answer only for services that are available for follow-up in your healthcare system.**

Which mechanisms do your ED providers commonly use to communicate with follow-up providers in the following services?

|                                                       | Check all that apply                                    |                                              |                          |                                        |                          |                           |                                  |
|-------------------------------------------------------|---------------------------------------------------------|----------------------------------------------|--------------------------|----------------------------------------|--------------------------|---------------------------|----------------------------------|
|                                                       | Written/printed discharge instructions given to patient | CPRS Note (e.g. designate additional signer) | CPRS Consult             | Secure email or other messaging system | Voicemail                | Direct phone conversation | Other Mechanism (describe below) |
| Primary Care <u>within VA</u>                         | <input type="checkbox"/>                                | <input type="checkbox"/>                     | <input type="checkbox"/> | <input type="checkbox"/>               | <input type="checkbox"/> | <input type="checkbox"/>  | <input type="checkbox"/>         |
| Primary Care contract care ( <u>outside VA</u> )      | <input type="checkbox"/>                                | <input type="checkbox"/>                     | <input type="checkbox"/> | <input type="checkbox"/>               | <input type="checkbox"/> | <input type="checkbox"/>  | <input type="checkbox"/>         |
| Women's Health Clinic                                 | <input type="checkbox"/>                                | <input type="checkbox"/>                     | <input type="checkbox"/> | <input type="checkbox"/>               | <input type="checkbox"/> | <input type="checkbox"/>  | <input type="checkbox"/>         |
| OB/GYN care <u>within VA</u>                          | <input type="checkbox"/>                                | <input type="checkbox"/>                     | <input type="checkbox"/> | <input type="checkbox"/>               | <input type="checkbox"/> | <input type="checkbox"/>  | <input type="checkbox"/>         |
| OB/GYN contract care ( <u>outside VA</u> )            | <input type="checkbox"/>                                | <input type="checkbox"/>                     | <input type="checkbox"/> | <input type="checkbox"/>               | <input type="checkbox"/> | <input type="checkbox"/>  | <input type="checkbox"/>         |
| Psych/MH <u>within VA</u>                             | <input type="checkbox"/>                                | <input type="checkbox"/>                     | <input type="checkbox"/> | <input type="checkbox"/>               | <input type="checkbox"/> | <input type="checkbox"/>  | <input type="checkbox"/>         |
| Psych/MH contract care ( <u>outside VA</u> )          | <input type="checkbox"/>                                | <input type="checkbox"/>                     | <input type="checkbox"/> | <input type="checkbox"/>               | <input type="checkbox"/> | <input type="checkbox"/>  | <input type="checkbox"/>         |
| Other Specialties <u>within VA</u>                    | <input type="checkbox"/>                                | <input type="checkbox"/>                     | <input type="checkbox"/> | <input type="checkbox"/>               | <input type="checkbox"/> | <input type="checkbox"/>  | <input type="checkbox"/>         |
| Other Specialties contract care ( <u>outside VA</u> ) | <input type="checkbox"/>                                | <input type="checkbox"/>                     | <input type="checkbox"/> | <input type="checkbox"/>               | <input type="checkbox"/> | <input type="checkbox"/>  | <input type="checkbox"/>         |

Describe other mechanisms your ED providers use to communicate with follow-up providers.

How would you rate the sufficiency of these mechanisms for communicating about and coordinating post-ED care with the following services?

|                                                       | Not at all sufficient | Minimally sufficient  | Moderately sufficient | Completely sufficient |
|-------------------------------------------------------|-----------------------|-----------------------|-----------------------|-----------------------|
| Primary Care <u>within VA</u>                         | <input type="radio"/> | <input type="radio"/> | <input type="radio"/> | <input type="radio"/> |
| Primary Care contract care ( <u>outside VA</u> )      | <input type="radio"/> | <input type="radio"/> | <input type="radio"/> | <input type="radio"/> |
| Women's Health Clinic                                 | <input type="radio"/> | <input type="radio"/> | <input type="radio"/> | <input type="radio"/> |
| OB/GYN care <u>within VA</u>                          | <input type="radio"/> | <input type="radio"/> | <input type="radio"/> | <input type="radio"/> |
| OB/GYN contract care ( <u>outside VA</u> )            | <input type="radio"/> | <input type="radio"/> | <input type="radio"/> | <input type="radio"/> |
| Psych/MH <u>within VA</u>                             | <input type="radio"/> | <input type="radio"/> | <input type="radio"/> | <input type="radio"/> |
| Psych/MH contract care ( <u>outside VA</u> )          | <input type="radio"/> | <input type="radio"/> | <input type="radio"/> | <input type="radio"/> |
| Other Specialties <u>within VA</u>                    | <input type="radio"/> | <input type="radio"/> | <input type="radio"/> | <input type="radio"/> |
| Other Specialties contract care ( <u>outside VA</u> ) | <input type="radio"/> | <input type="radio"/> | <input type="radio"/> | <input type="radio"/> |

**OPTIONAL:**

Use this space to comment on any answers in this section on **patient follow-up** that you think need clarification.
